# Supplementary material for: Photoreductive synthesis of monodispersed Au nanoparticles with citric acid as reductant and surface stabilizing reagent
Source: Royal Society of Chemistry journal article supplement (doi:10.1039/c6ra27771c), 2017-01-01
Supplement: c6ra27771c1.pdf [file c6ra27771c1.pdf]

## Photoreductive synthesis of monodispersed Au nanoparticles with citric acid as reductant and surface stabilizing reagent

Yasuhiro Shiraishi,<sup>\*a,b</sup> Haruki Tanaka,<sup>a</sup> Hirokatsu Sakamoto,<sup>a</sup> Satoshi Ichikawa,<sup>c</sup> and Takayuki Hirai<sup>a</sup>

[a] Research Center for Solar Energy Chemistry, and Division of Chemical Engineering, Graduate School of Engineering Science, Osaka University, Toyonaka 560-8531 (Japan)

[b] Precursory Research for Embryonic Science and Technology (PRESTO), Japan Science and Technology Agency (JST), Saitama 332-0012 (Japan).

[c] Institute for NanoScience Design, Osaka University, Toyonaka 560-8531 (Japan)

E-mail: shiraish@cheng.es.osaka-u.ac.jp

### Electronic Supplementary Information (ESI†)

#### CONTENTS

|                                                                                              | page |
|----------------------------------------------------------------------------------------------|------|
| <b>Fig. S1</b> Effect of temperature on thermal reduction method for AuNPs preparation ..... | S2   |
| <b>Fig. S2</b> XPS charts of AuNPs prepared by thermal reduction and photoreduction .....    | S3   |
| <b>Fig. S3</b> <sup>1</sup> H NMR analysis of oxidation products of citric acid .....        | S3   |
| <b>Fig. S4</b> Effect of light intensity on photoreductive AuNPs preparation. ....           | S4   |
| <b>Fig. S5</b> Effect of citric acid amount on photoreductive AuNPs preparation. ....        | S5   |
| <b>Fig. S6</b> Effect of light wavelengths on photoreductive AuNPs preparation. ....         | S6   |

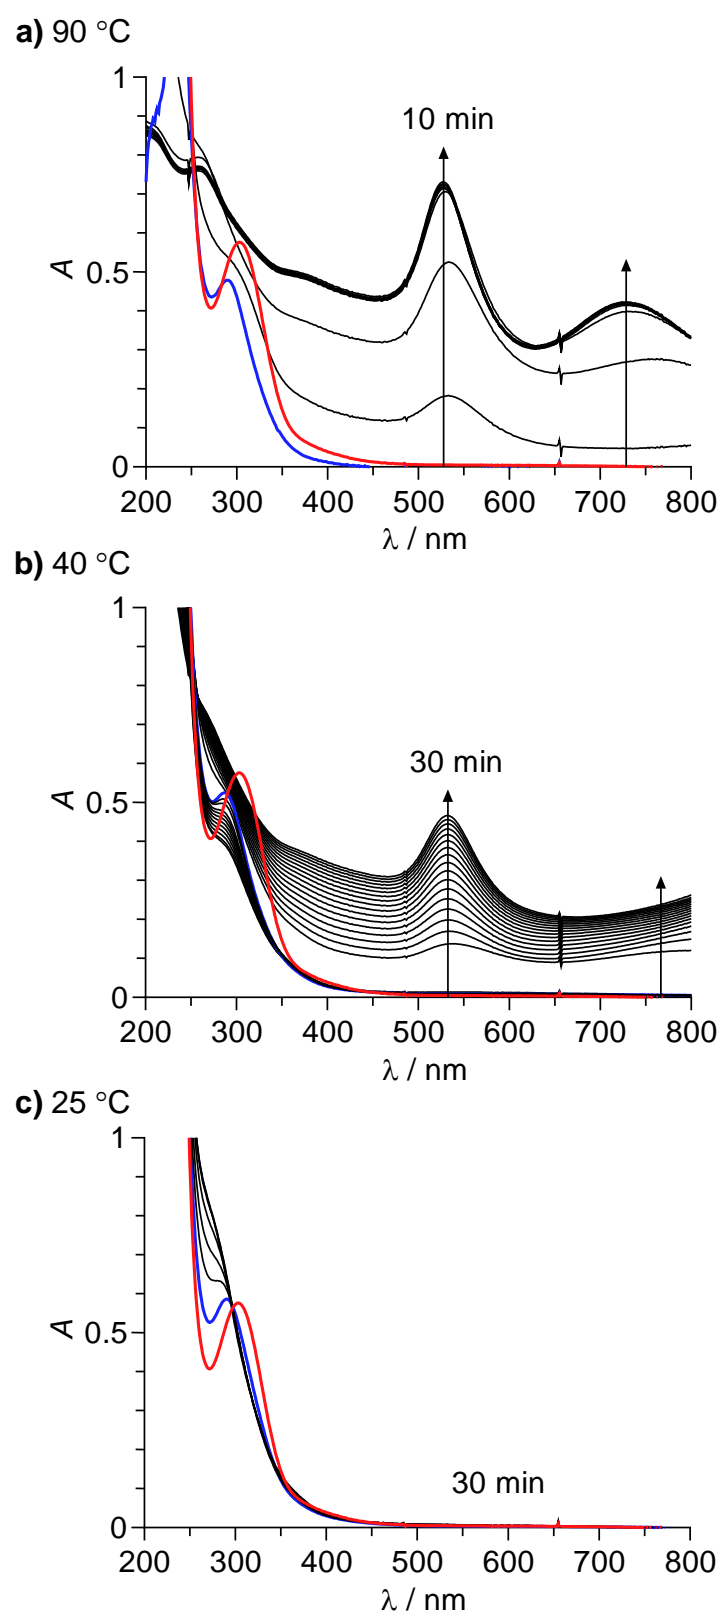

**Fig. S1** Time-dependent change in absorption spectra of water containing  $\text{HAuCl}_4 \cdot 4\text{H}_2\text{O}$  (0.2 mM) and citric acid (0.5 mM) during stirring at (a) 90 °C, (b) 40 °C and (c) 25 °C in the dark. The red is the spectrum for the solution containing  $\text{HAuCl}_4 \cdot 4\text{H}_2\text{O}$  at 25 °C, and the blue is the spectrum for the solution after addition of citric acid (1 min).

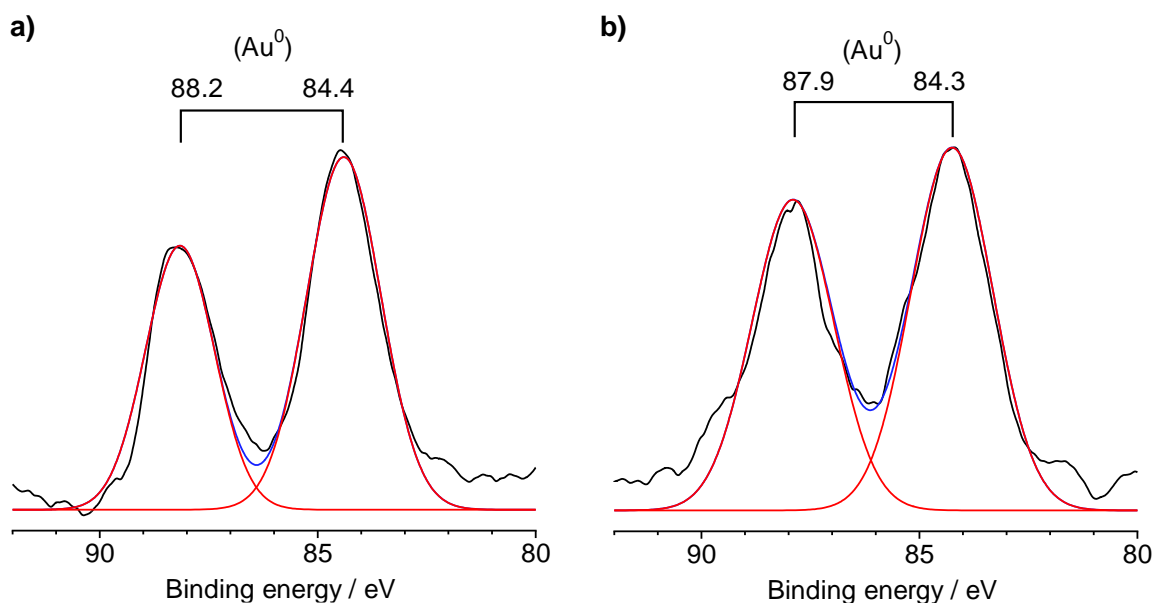

**Fig. S2** XPS (Au 4f level) charts of AuNPs prepared by (a) thermal reduction (60 °C, 25 min) and (b) photoreduction (25 °C, 100 min) methods. The blue line is sum of the components.

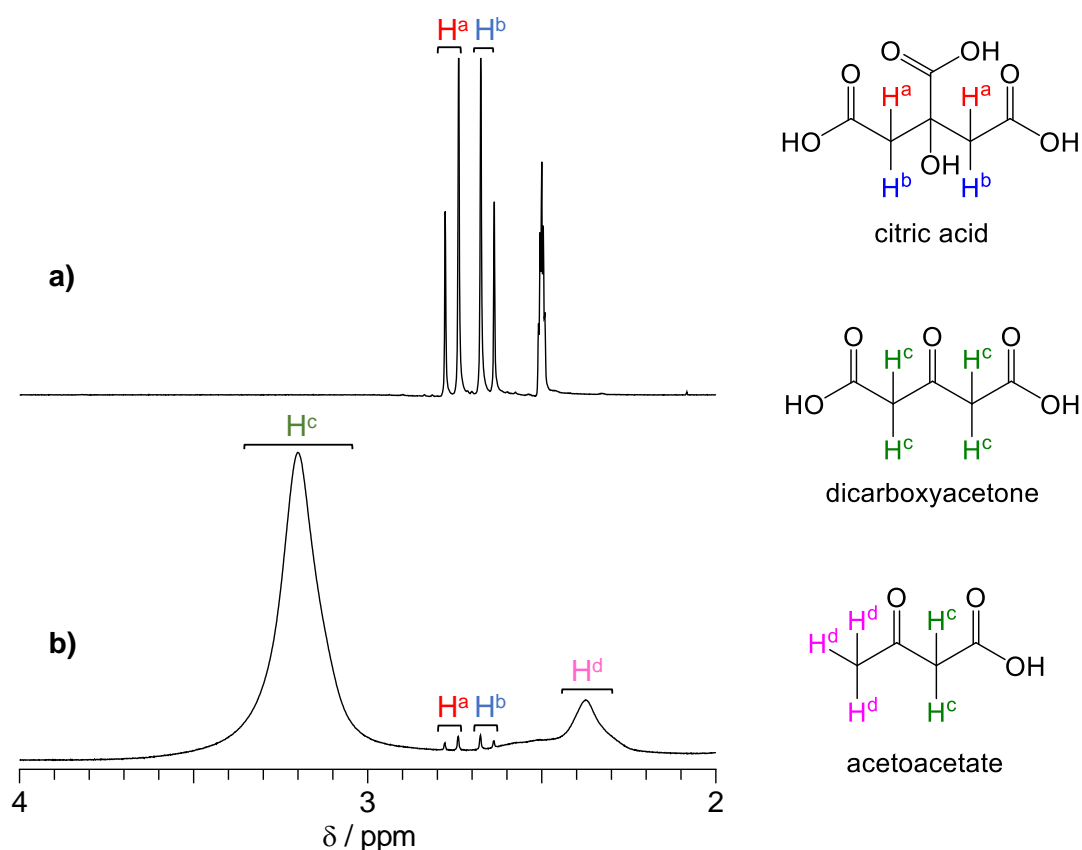

**Fig. S3** <sup>1</sup>H NMR analysis (DMSO-d<sub>6</sub>, 400 MHz) of (a) citric acid and (b) the oxidation products obtained after photoirradiation of water containing H<sub>2</sub>AuCl<sub>4</sub>·4H<sub>2</sub>O (0.8 mM) and citric acid (2.0 mM) for 100 min. The AuNPs in the solution were removed by centrifugation. The resulting solution was concentrated by evaporation and dissolved in DMSO-d<sub>6</sub>. The ratio of citric acid, dicarboxyacetone and acetoacetate was determined to be 2:55:10.

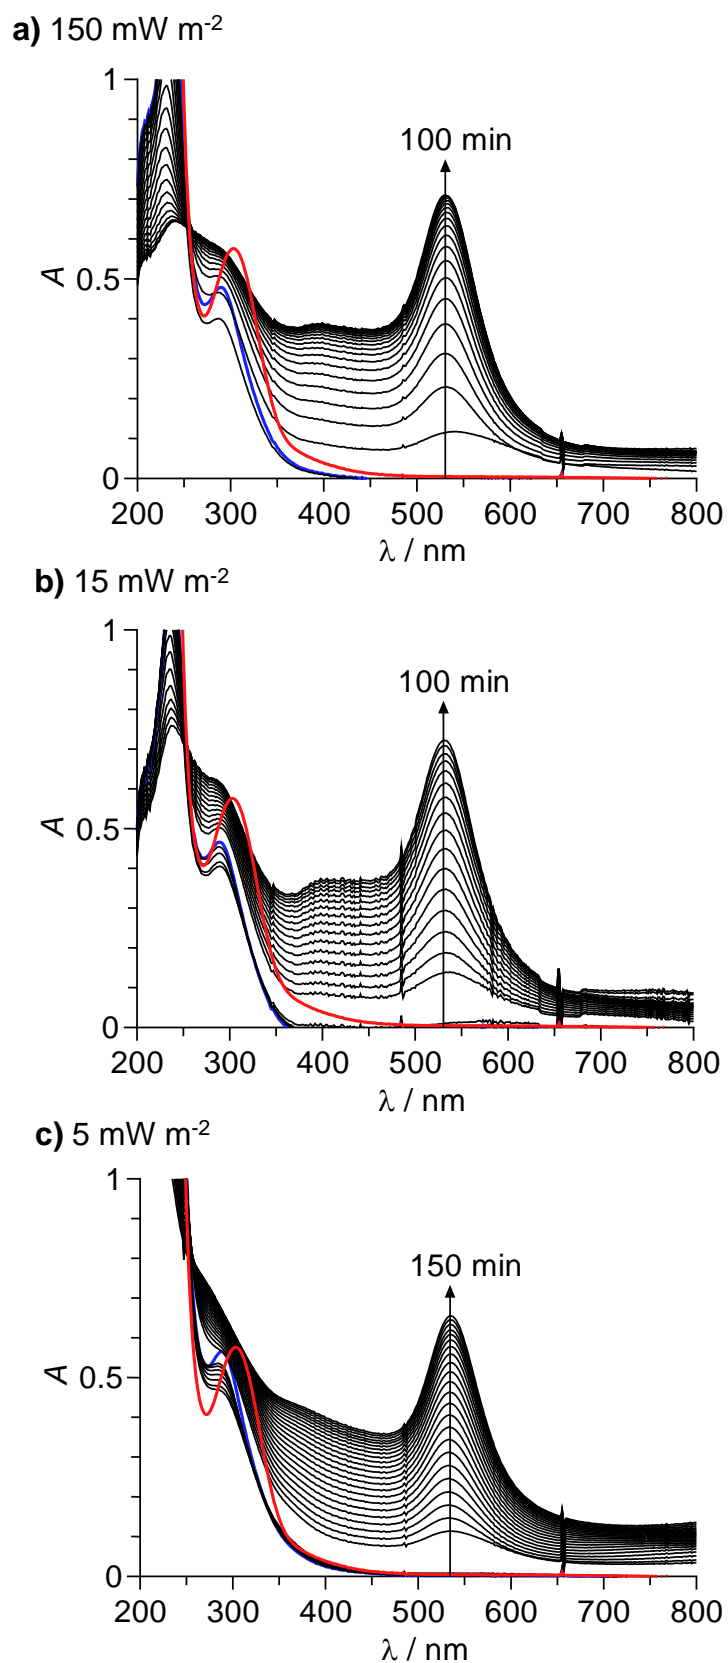

**Fig. S4** Time-dependent change in absorption spectra of water containing H<sub>2</sub>AuCl<sub>4</sub>·4H<sub>2</sub>O (0.2 mM) and citric acid (0.5 mM) during stirring at 25 °C under 254 nm irradiation at different light intensity. The red is the spectrum for the solution containing H<sub>2</sub>AuCl<sub>4</sub>·4H<sub>2</sub>O at 25 °C, and the blue is the spectrum for the solution after addition of citric acid (1 min).

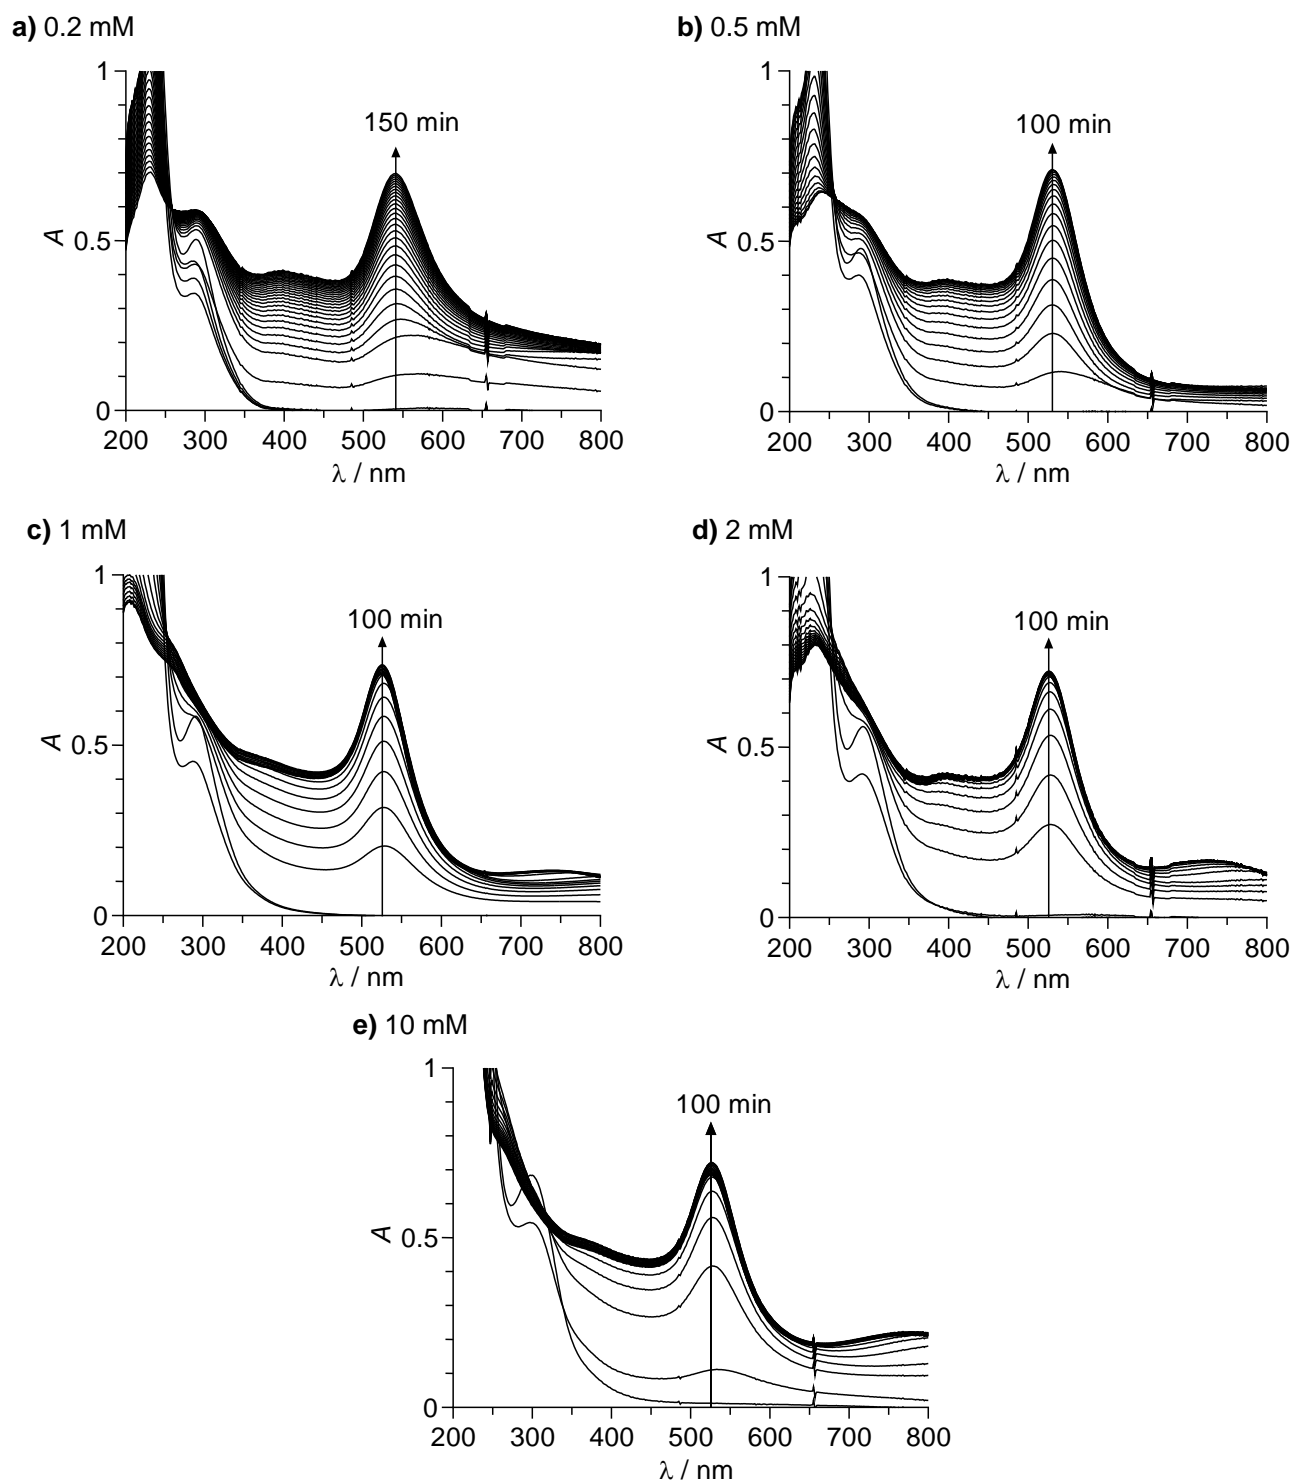

**Fig. S5** Time-dependent change in absorption spectra of water containing  $\text{H[AuCl}_4\text{]}\cdot 4\text{H}_2\text{O}$  (0.2 mM) and different amount of citric acid during stirring at 25 °C under 254 nm irradiation (light intensity:  $150 \text{ mW m}^{-2}$ ).

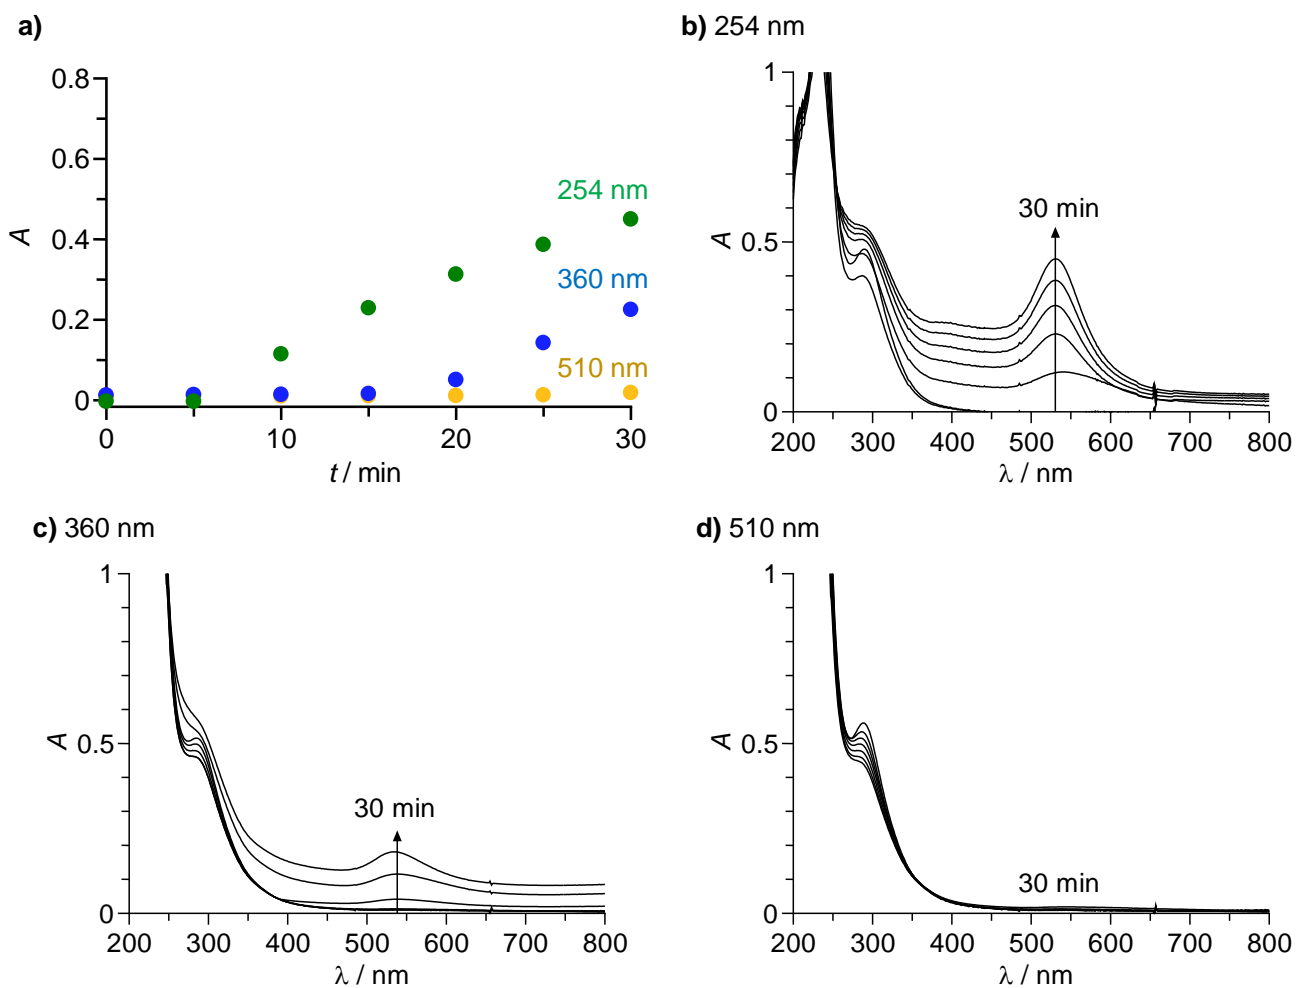

**Fig. S6** Time-dependent change in (a) the LSPR absorbance and (b-d) absorption spectra of water containing  $\text{HAuCl}_4 \cdot 4\text{H}_2\text{O}$  (0.2 mM) and citric acid (0.5 mM) obtained by stirring at 25 °C under light irradiation at different light wavelengths (light intensity:  $150 \text{ mW m}^{-2}$ ).
